# Supplementary material
Source: MDPI journal article supplement (https://www.mdpi.com/1424-8247/16/6/890)

Supplemental Figure S1A

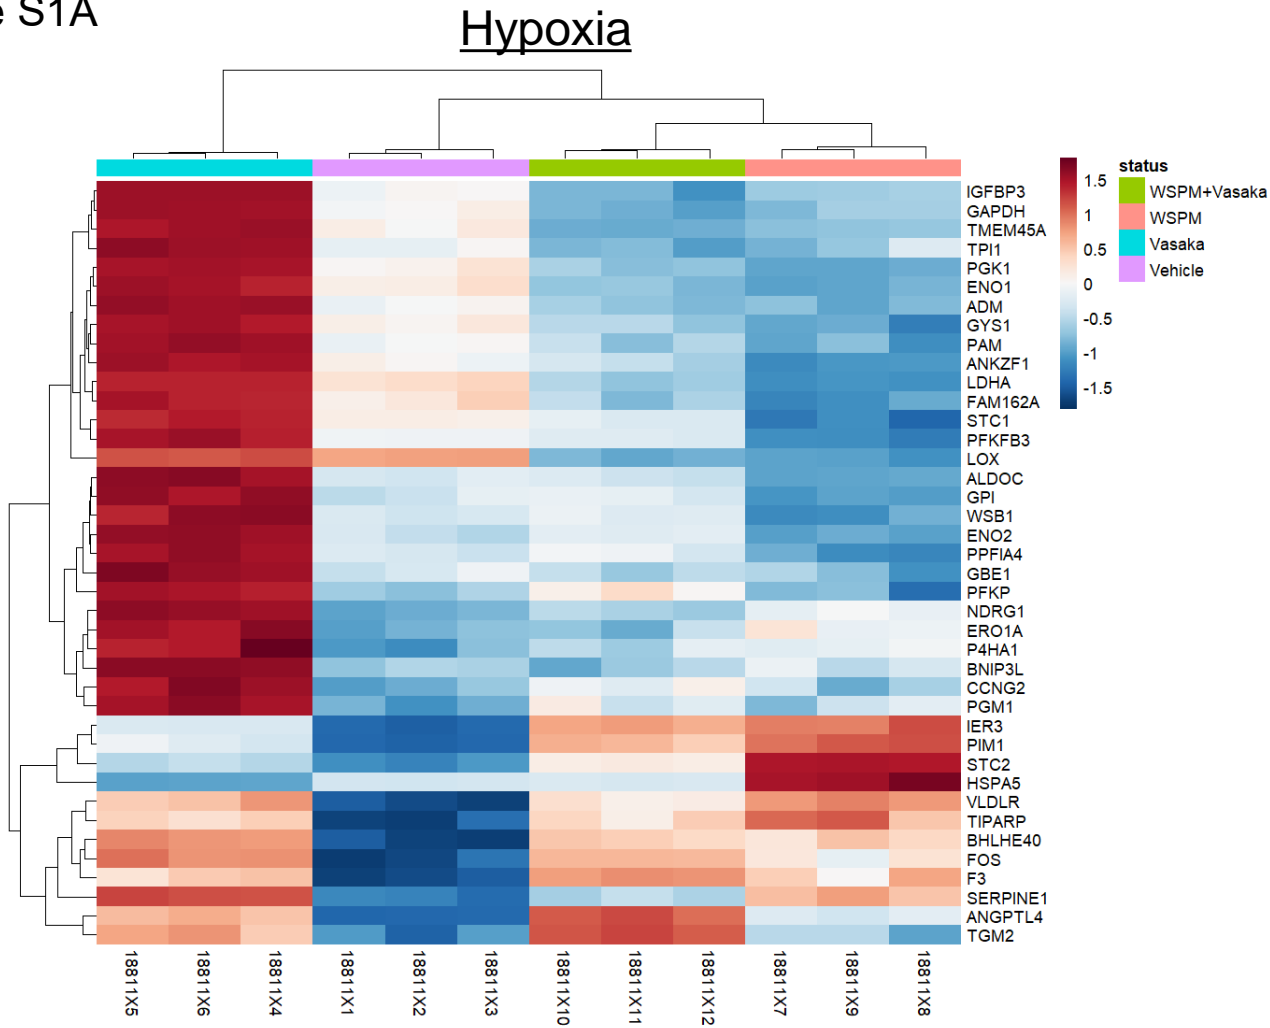

Supplemental Figure S1B

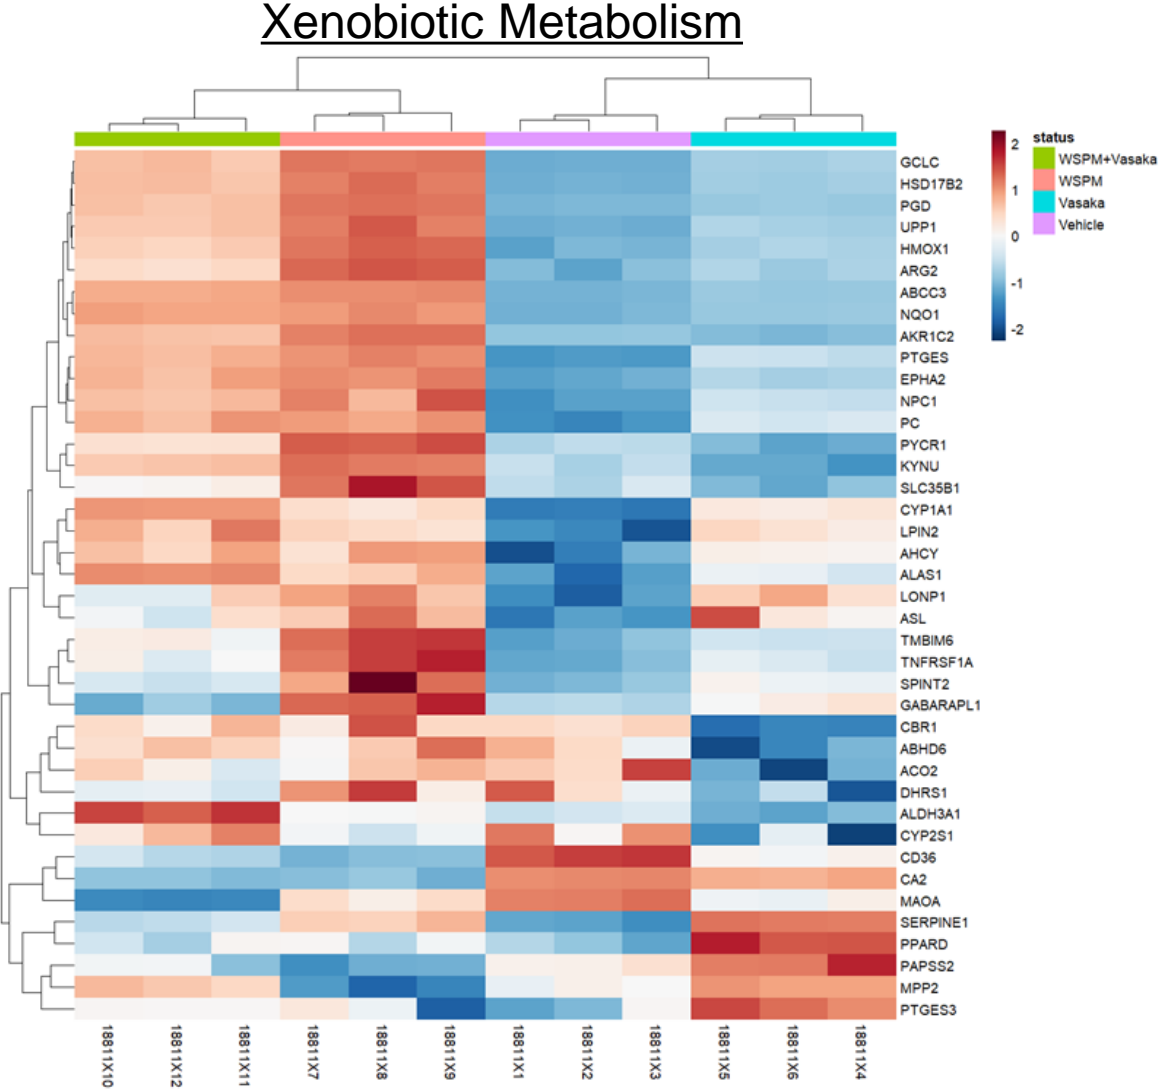

Supplemental Figure S1C

Kras Up

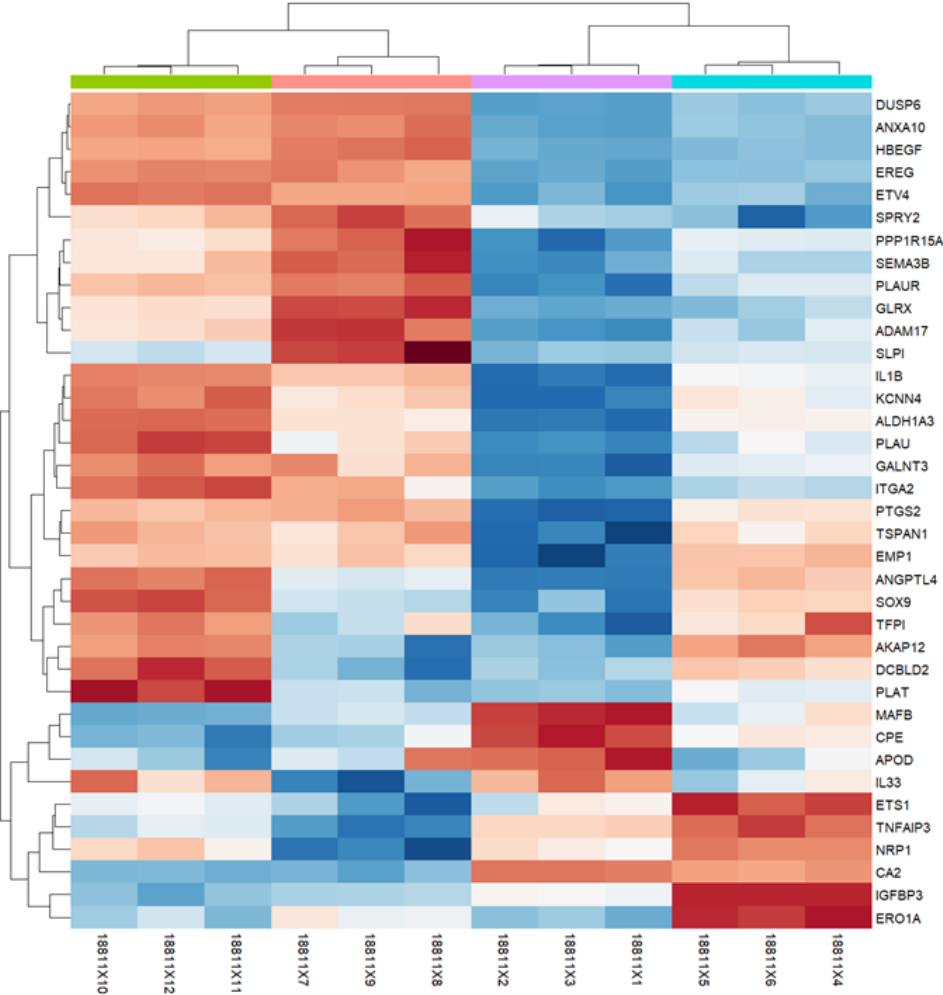

Kras Down

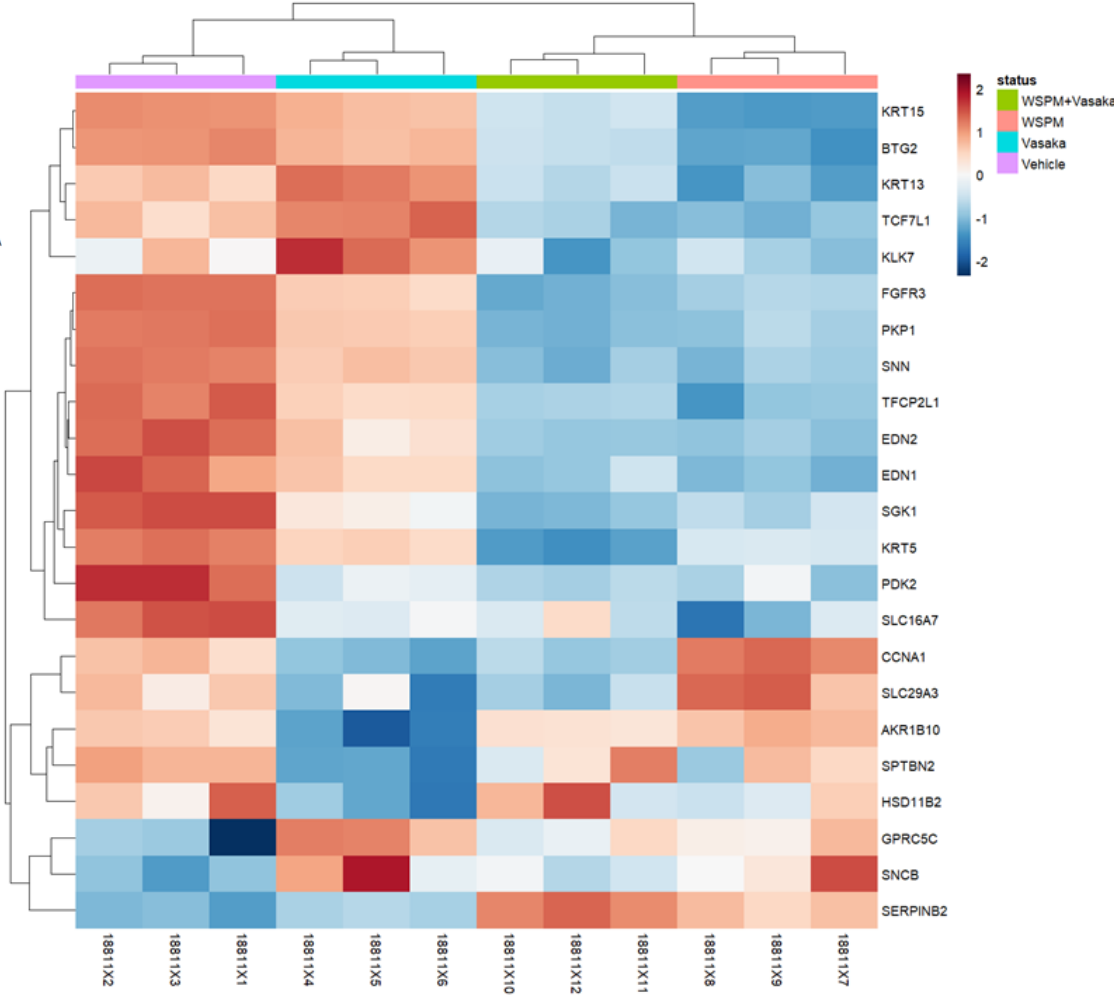

Supplemental Figure S1D

Glycolysis

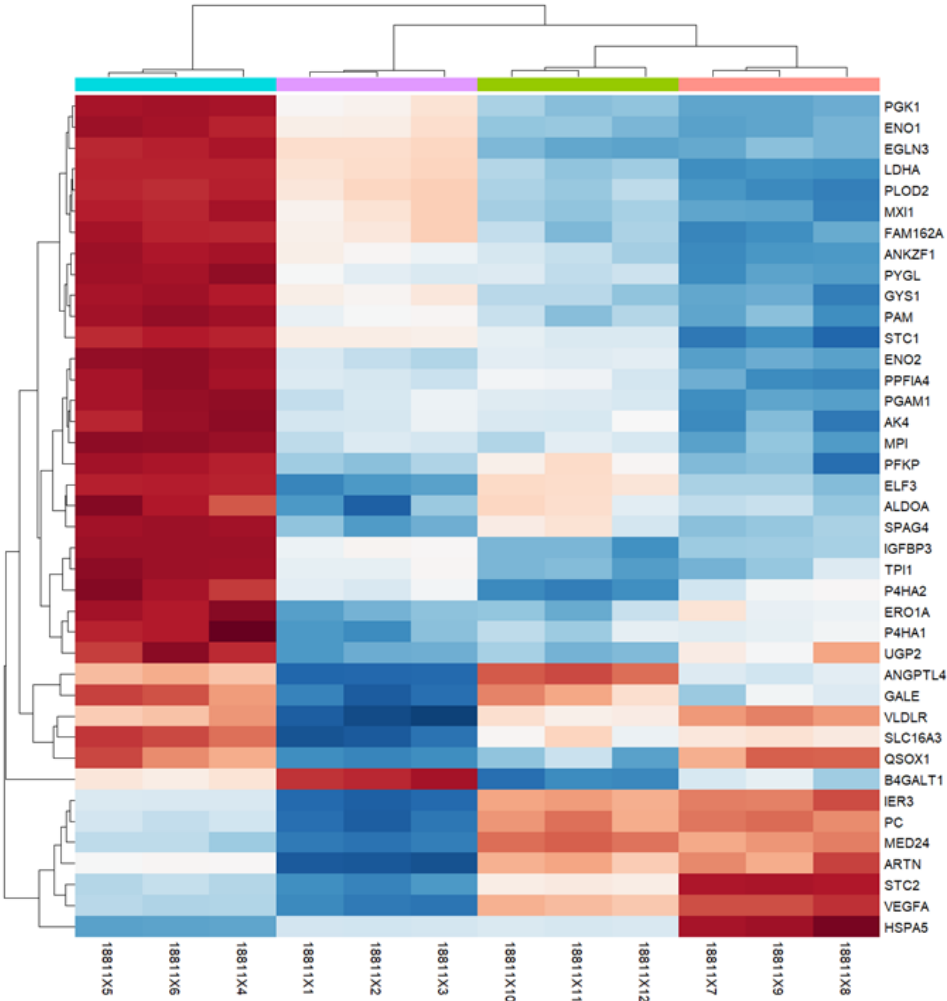

Cholesterol Homeostasis

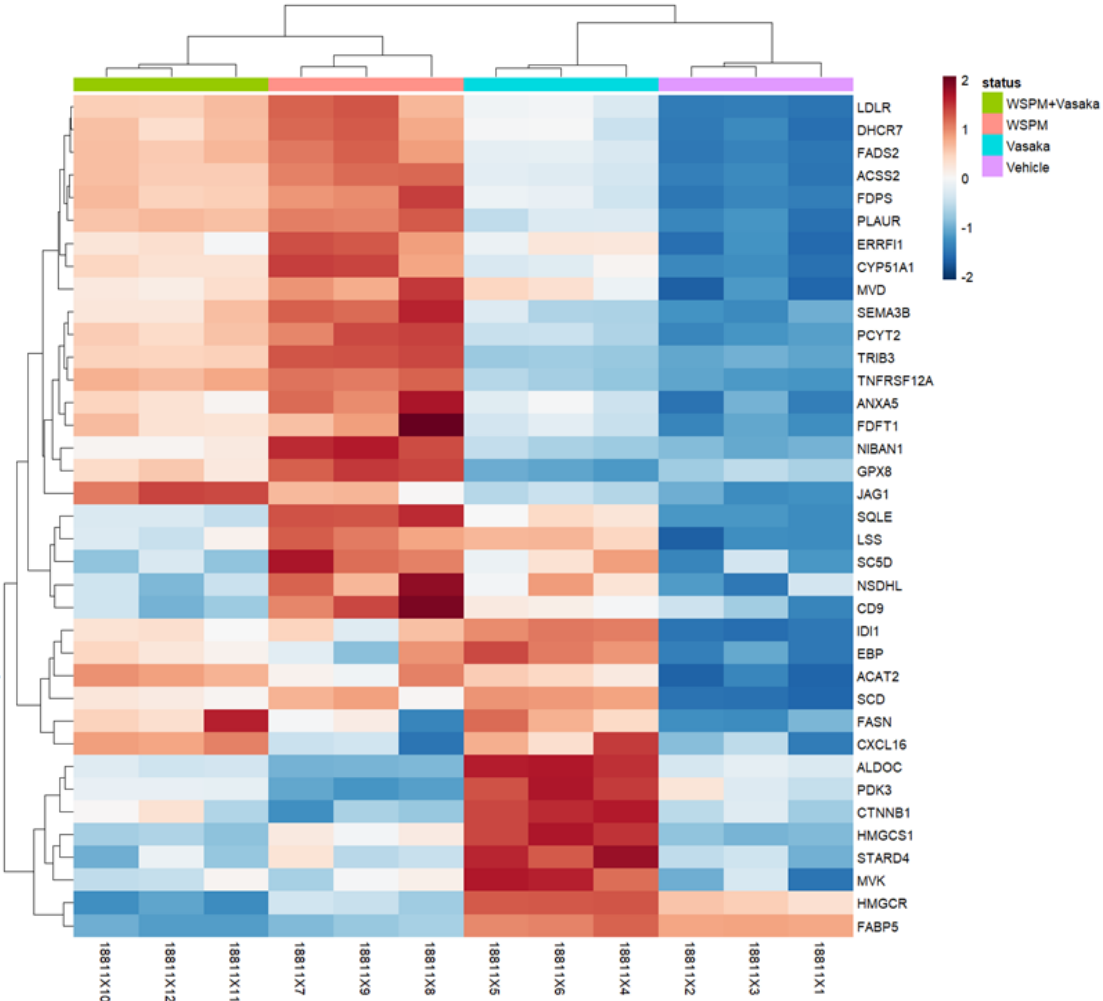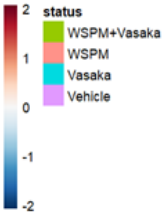

Supplemental Figure S1E

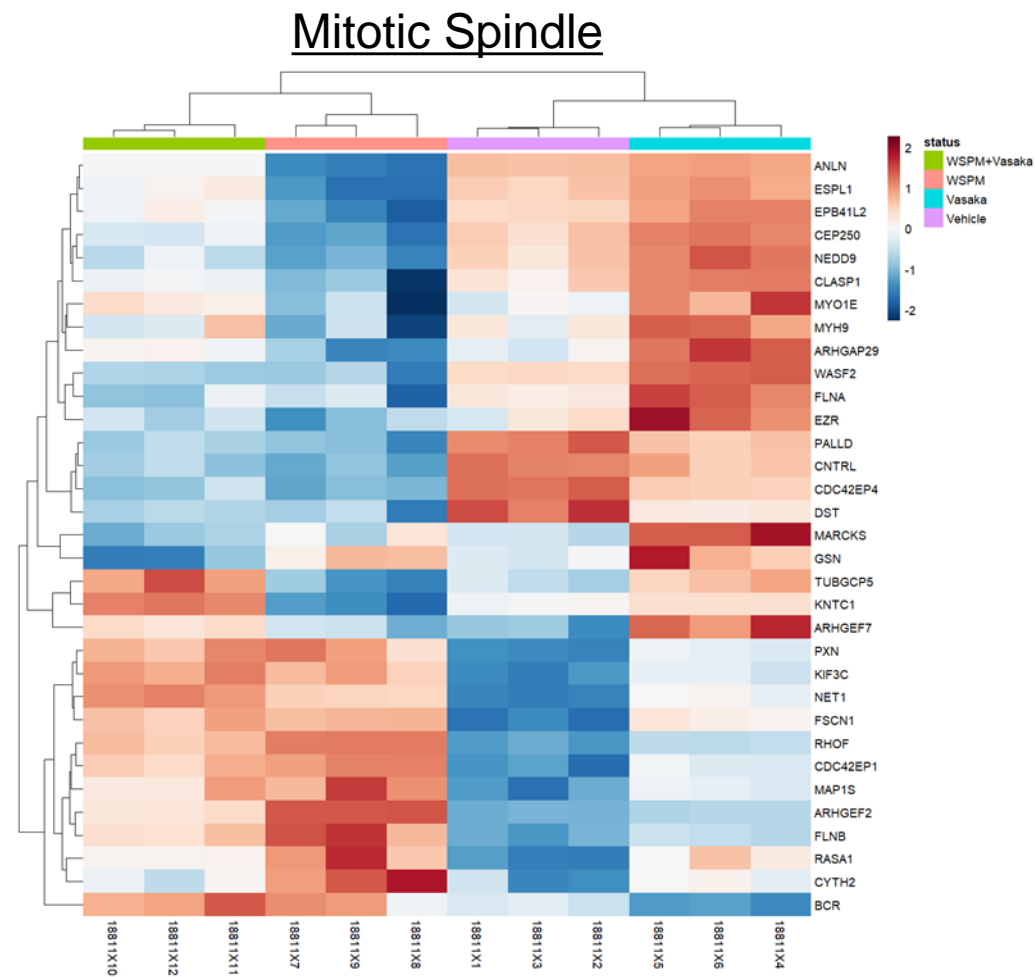

Supplemental Figure S2A

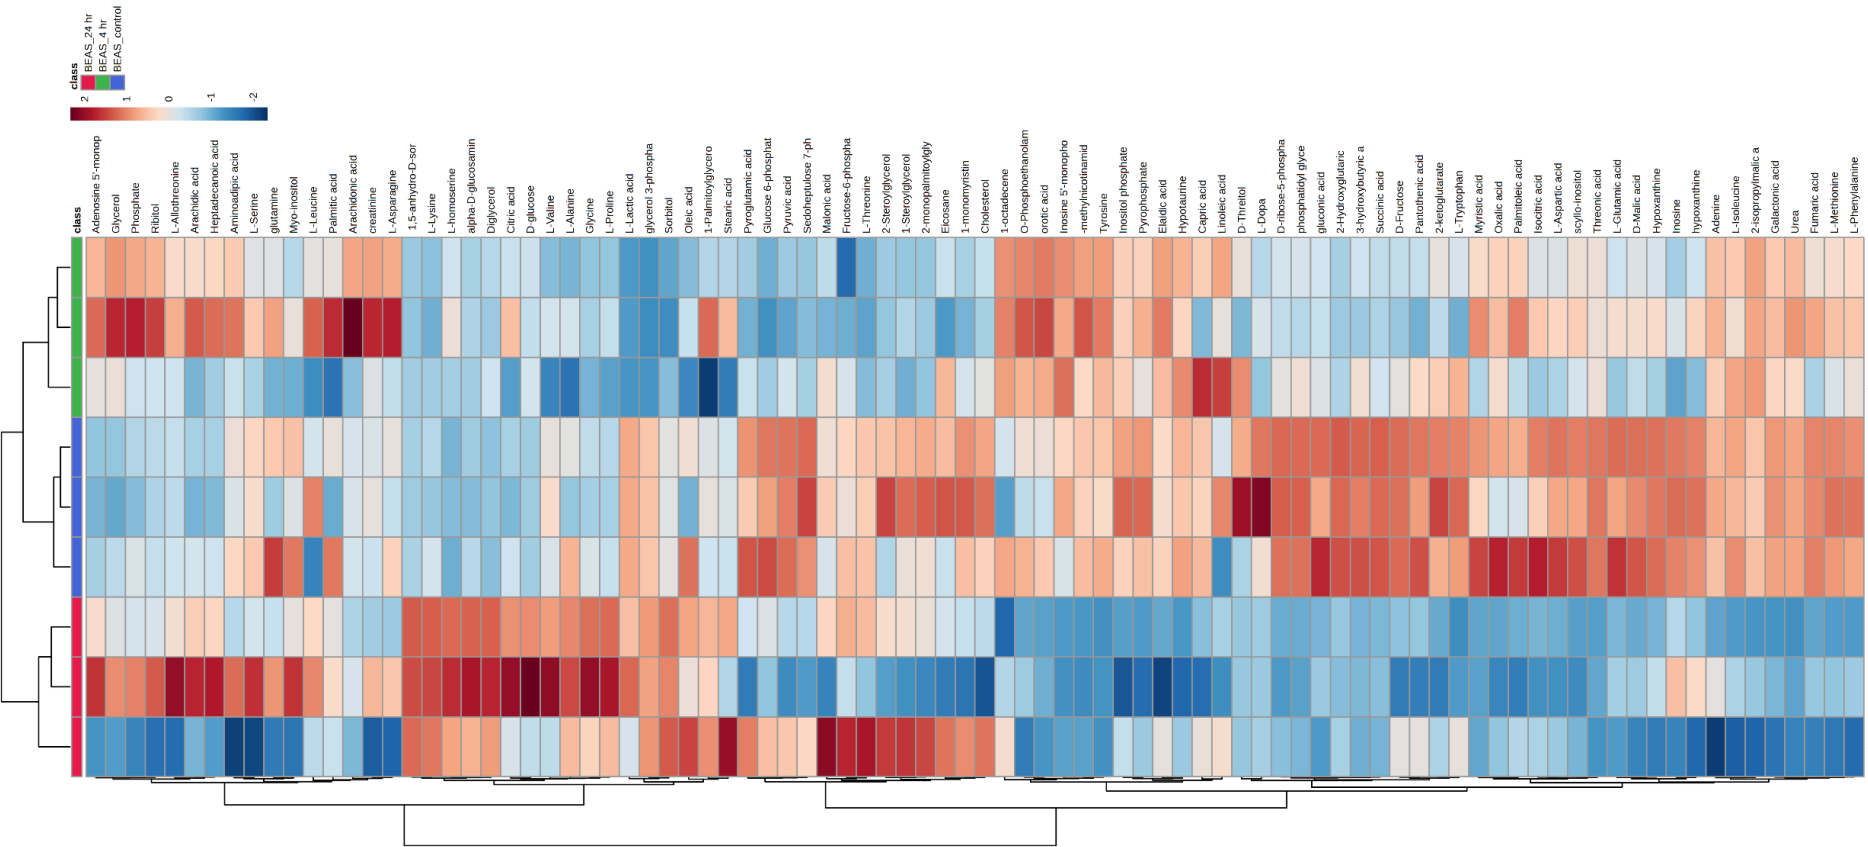

Supplemental  
Figure S2B

4h WSPM>Control  
Overview of Enriched Metabolite Sets (Top 25)

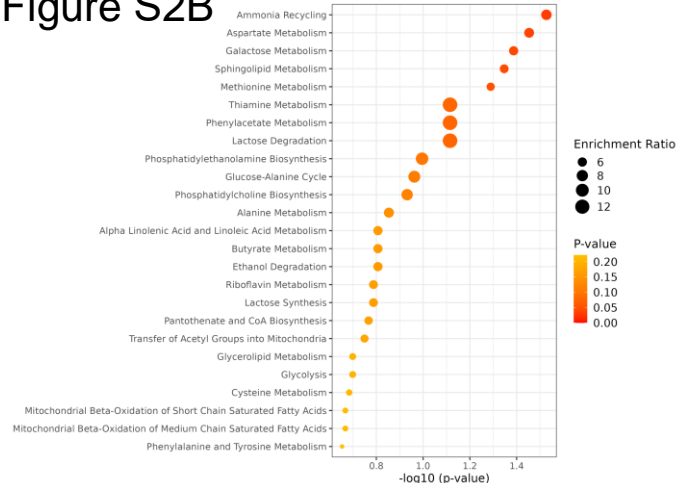

4h WSPM<Control  
Overview of Enriched Metabolite Sets (Top 25)

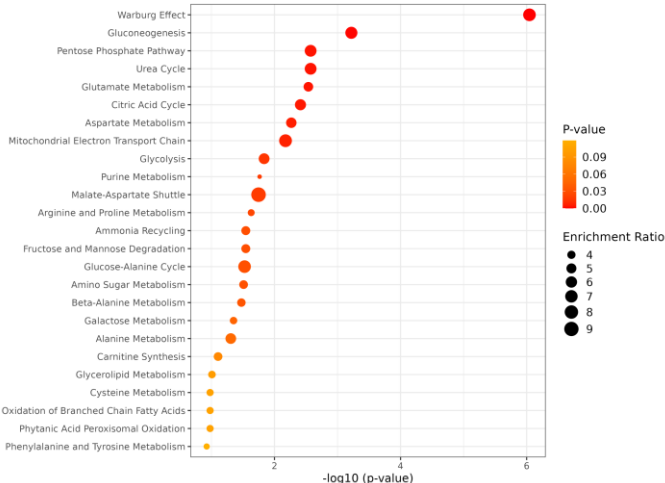

4h WSPM >1.25x  
Overview of Enriched Metabolite Sets (Top 25)

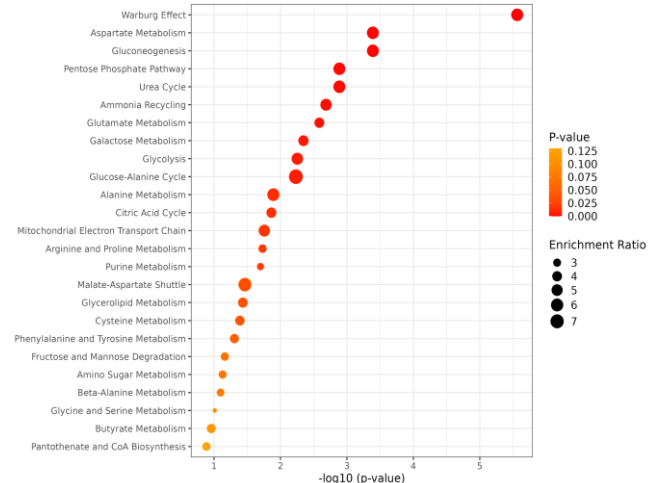

24h WSPM>Control  
Overview of Enriched Metabolite Sets (Top 25)

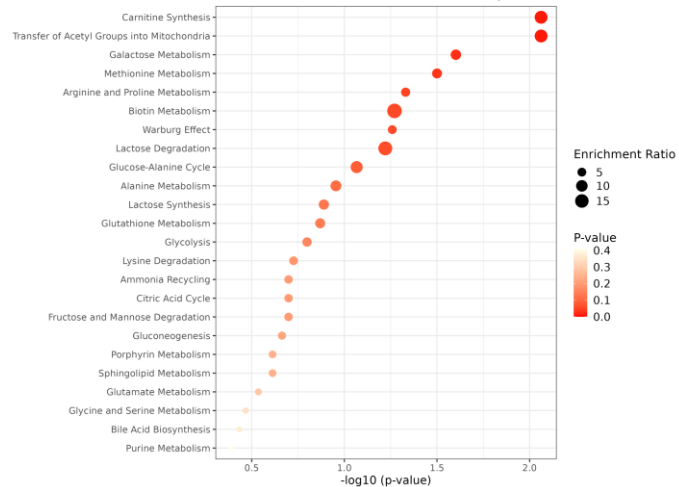

24h WSPM<Control  
Overview of Enriched Metabolite Sets (Top 25)

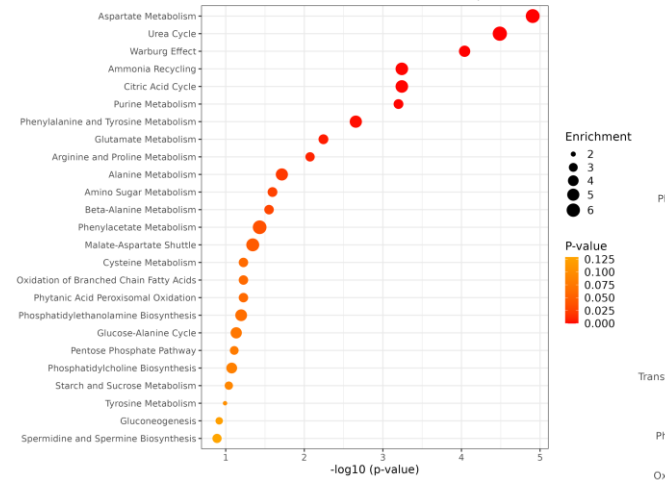

24h WSPM >1.25x  
Overview of Enriched Metabolite Sets (Top 25)

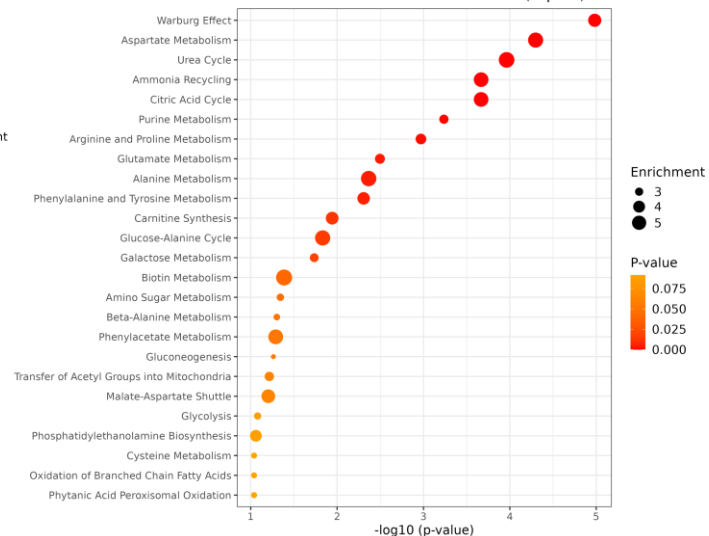

## Supplemental Figure S3 (Movies)

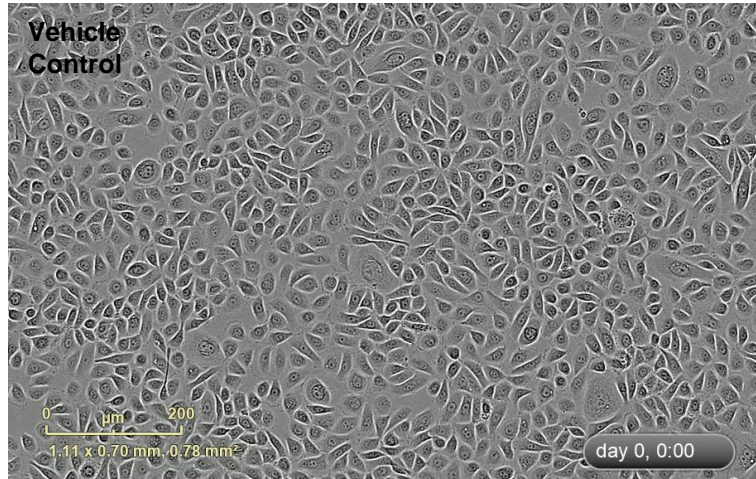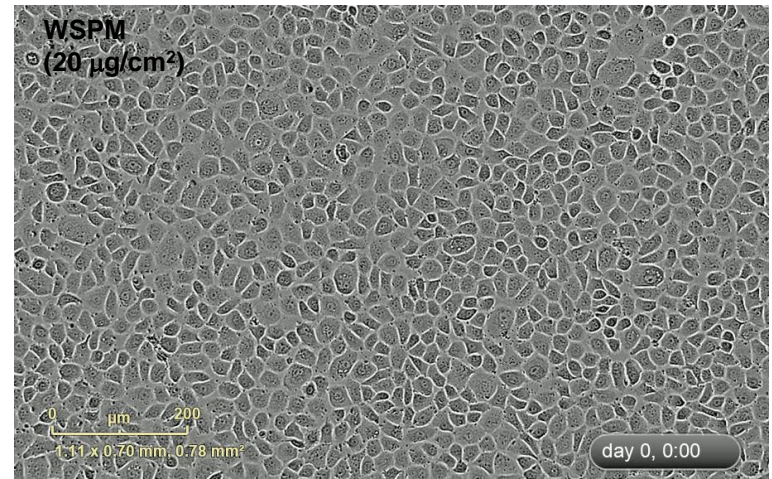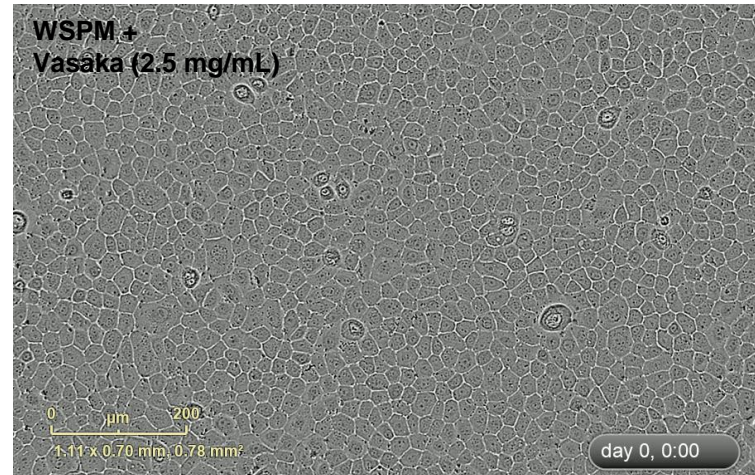

## Supplemental Figure S4A

### Vasaka tea vs. Standard mix

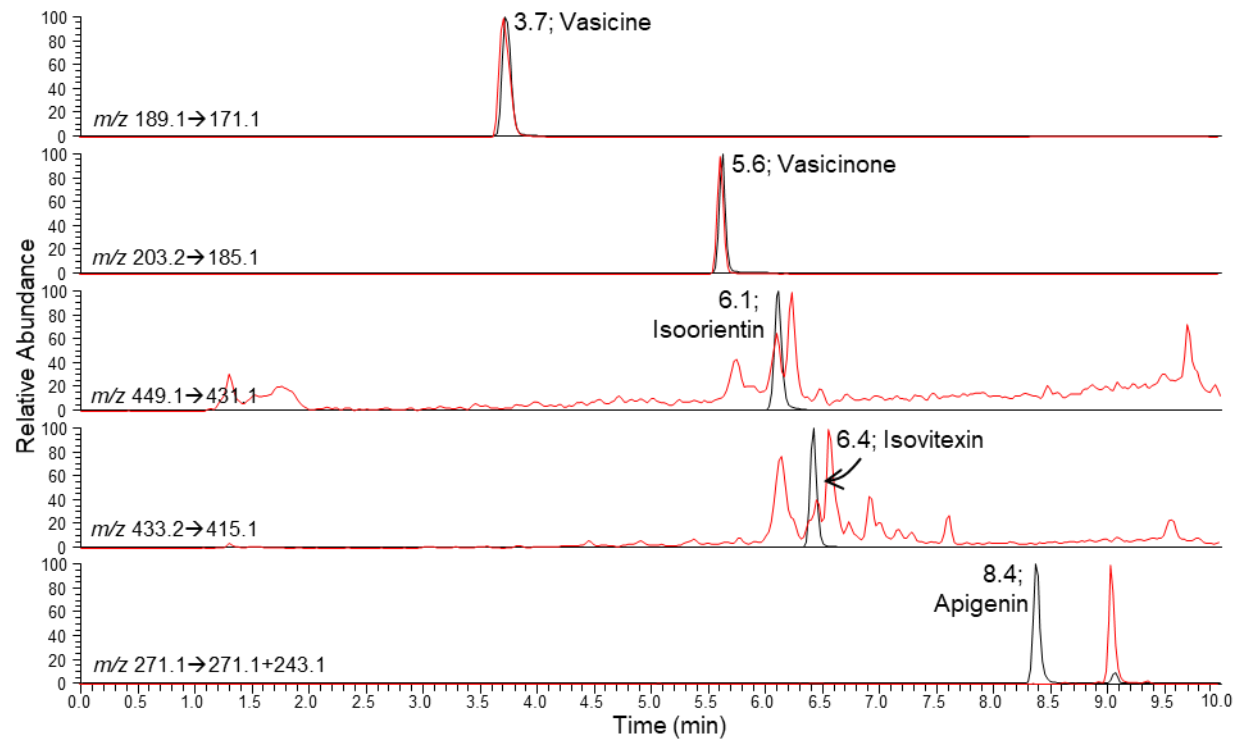

# Supplemental Figure S4B

## Vasicine (peganine) in Vasaka

Top: mzspec:GNPS:TASK-70ee48d645ee477d979dbcf5b7bd8eb6-spec/spec-00003.mzML:scan:1678  
Precursor  $m/z$ : 189.07 Charge: 0

Bottom: mzspec:GNPS:GNPS-LIBRARY:accession:CCMSLIB00005741884  
Precursor  $m/z$ : 189.10 Charge: 1

Cosine similarity = 0.9448

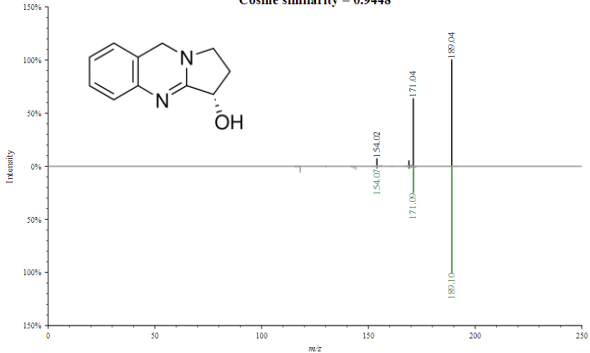

## Isoorientin (Homoorientin; Luteolin 6-C-glucoside) in Vasaka

Top: mzspec:GNPS:TASK-70ee48d645ee477d979dbcf5b7bd8eb6-spec/spec-00018.mzML:scan:8604  
Precursor  $m/z$ : 470.34 Charge: 0

Bottom: mzspec:GNPS:GNPS-LIBRARY:accession:CCMSLIB00006706566  
Precursor  $m/z$ : 471.09 Charge: 1

Cosine similarity = 0.2822

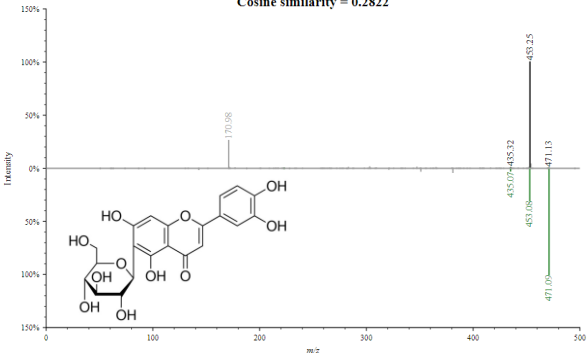

## Vasicinone in Vasaka

Top: mzspec:GNPS:TASK-70ee48d645ee477d979dbcf5b7bd8eb6-spec/spec-00021.mzML:scan:3645  
Precursor  $m/z$ : 202.96 Charge: 0

Bottom: mzspec:GNPS:GNPS-LIBRARY:accession:CCMSLIB00004693581  
Precursor  $m/z$ : 203.08 Charge: 1

Cosine similarity = 0.6037

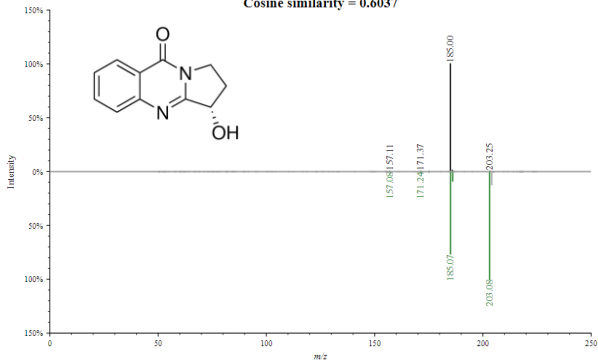

## Isovitexin (Homovitexin; Apigenin 6-C-glucoside) in Vasaka

Top: mzspec:GNPS:TASK-70ee48d645ee477d979dbcf5b7bd8eb6-spec/spec-00022.mzML:scan:18279  
Precursor  $m/z$ : 430.38 Charge: 0

Bottom: mzspec:GNPS:GNPS-LIBRARY:accession:CCMSLIB00003137388  
Precursor  $m/z$ : 431.10 Charge: 1

Cosine similarity = 0.9613

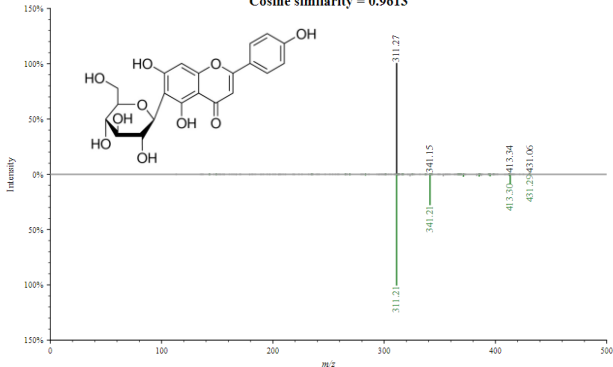

Supplemental Figure S5a

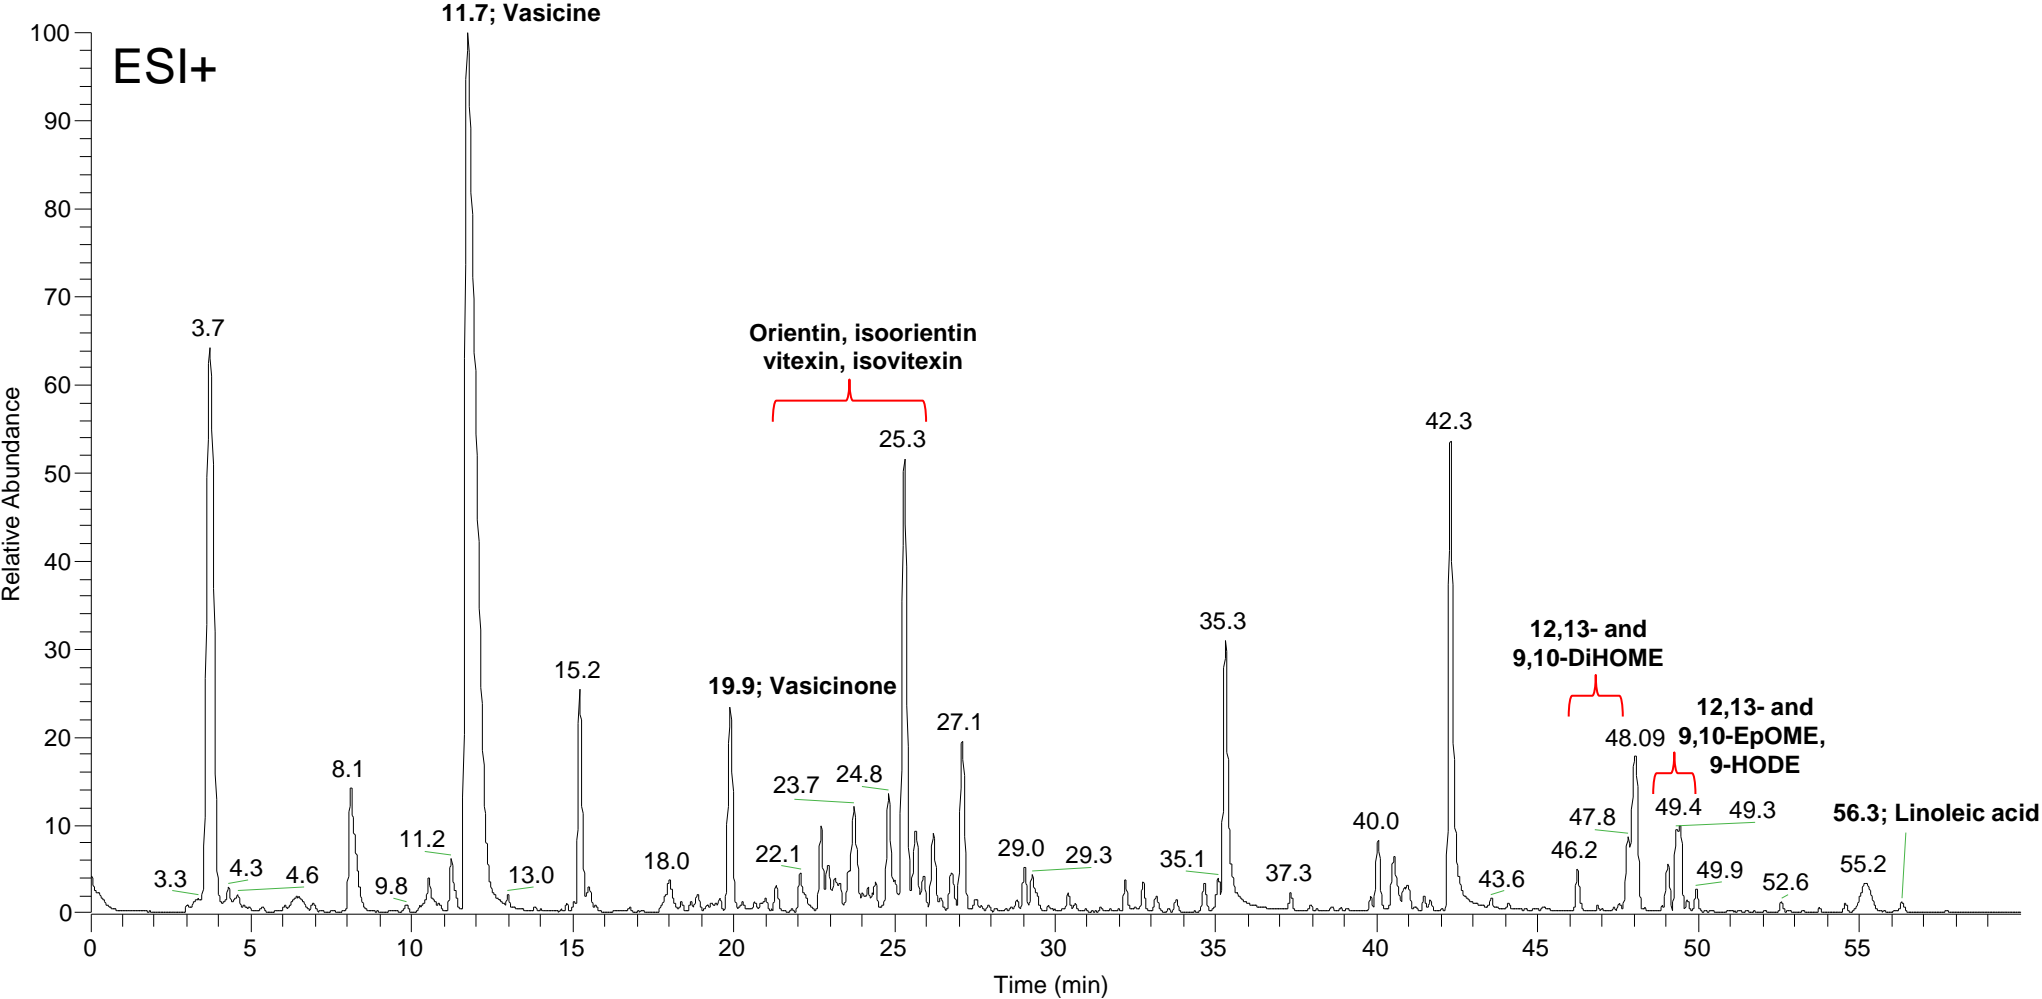

Supplemental Figure S5b

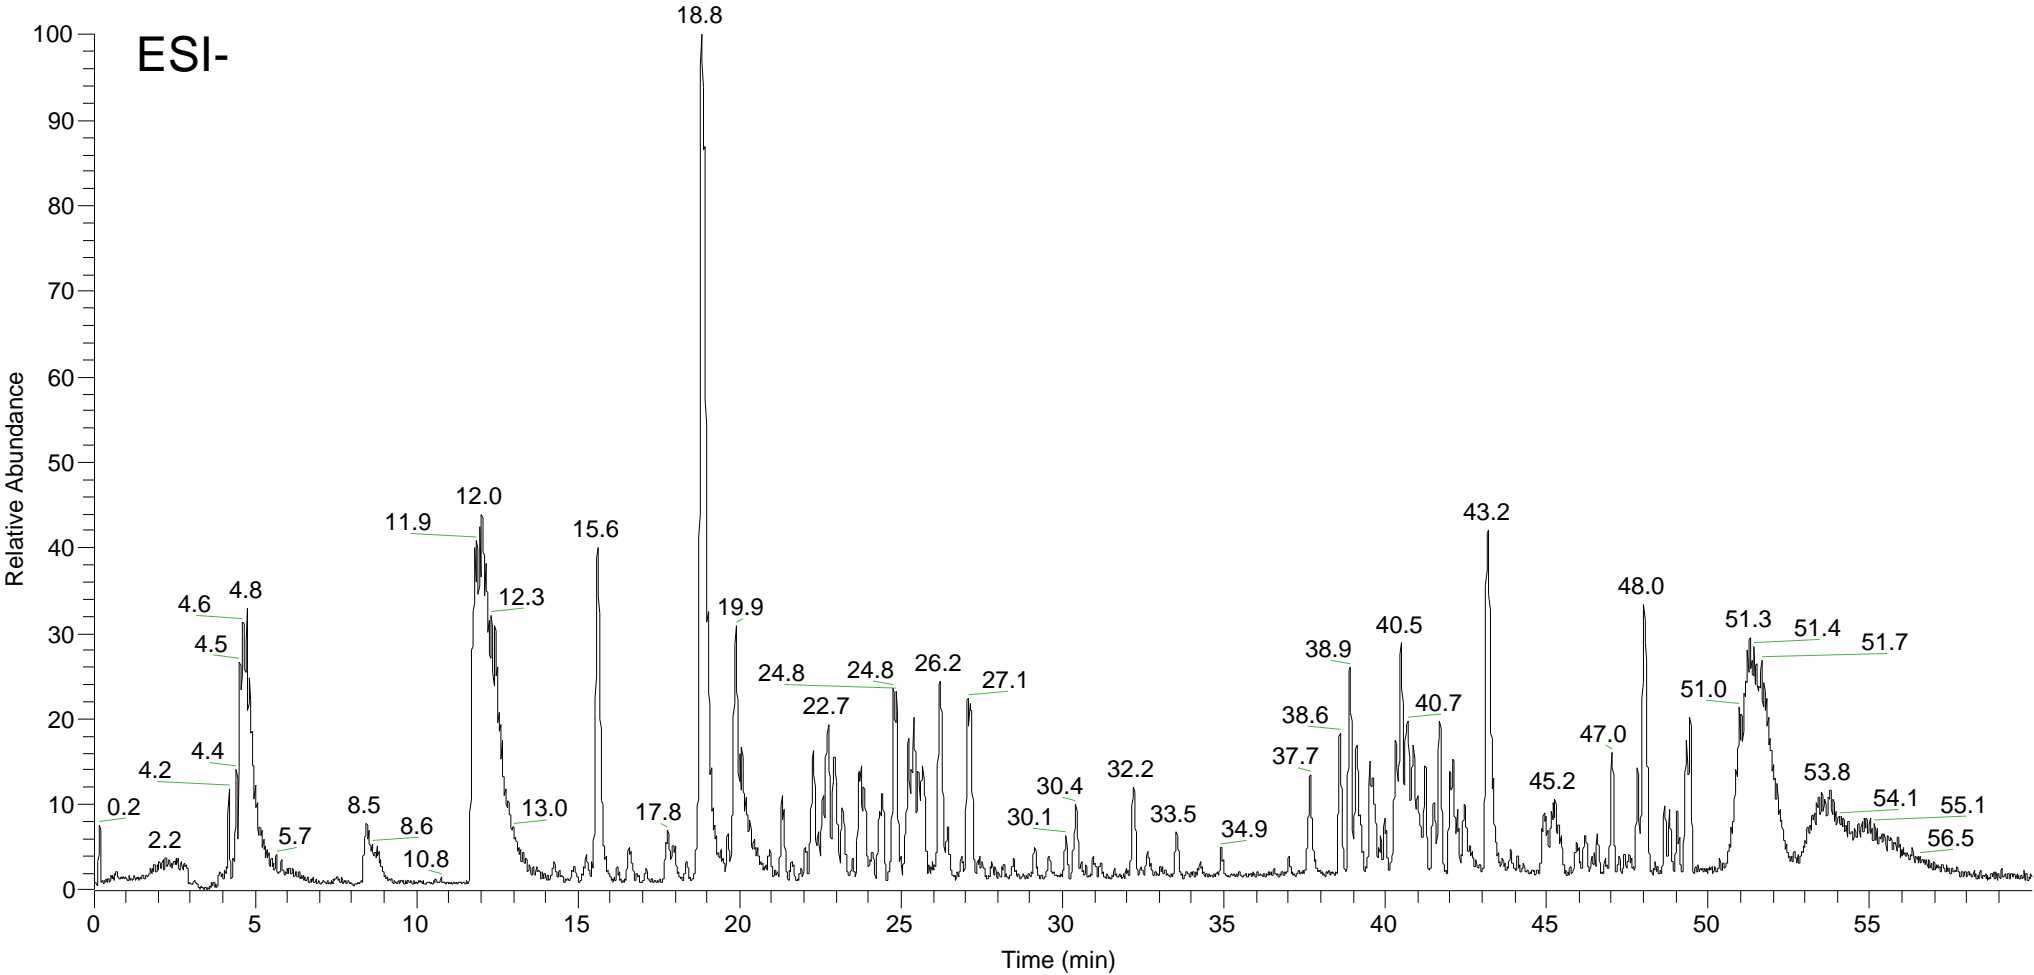

# Supplemental Figure S6A

## 9(10)-EpOME in Vasaka

Top: mzspect:GNPS:TASK-f9e0145ef8344d44b6e526e646b8b818-spec/spec-00004.mzML:scan:25298

Precursor m/z: 295.22 Charge: 0

Bottom: mzspect:GNPS:GNPS-LIBRARY:accession:CCMSLIB00005751808

Precursor m/z: 295.23 Charge: 1

Cosine similarity = 0.9455

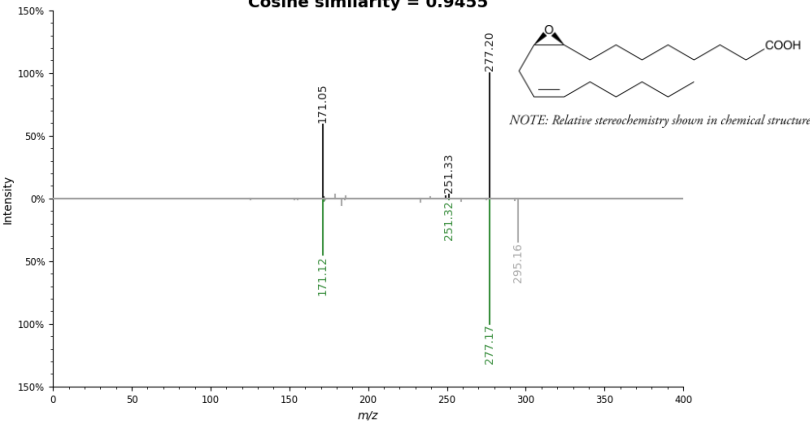

## 12(13)-EpOME in Vasaka

Top: mzspect:GNPS:TASK-efde7d7d1b7c467a97fe3811d1f82e29-spec/spec-00000.mzML:scan:4776

Precursor m/z: 295.24 Charge: 6

Bottom: mzspect:GNPS:GNPS-LIBRARY:accession:CCMSLIB00003137296

Precursor m/z: 295.23 Charge: 1

Cosine similarity = 0.9797

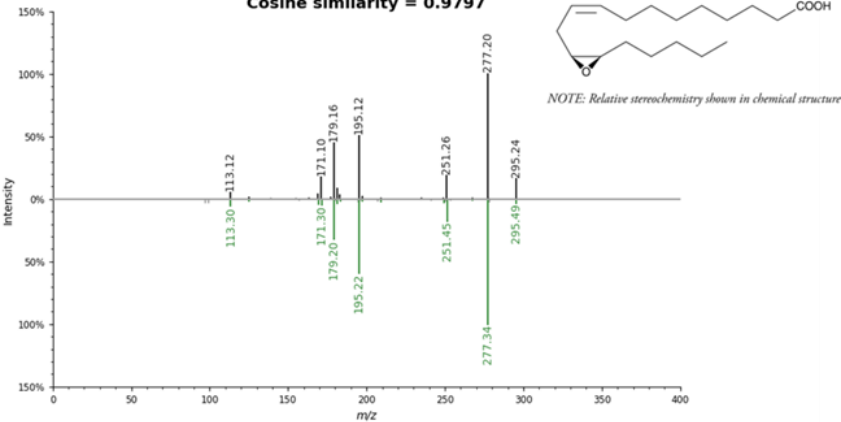

# Supplemental Figure S6B

## 9,10-DiHOME in Vasaka

Top: mzspect:GNPS:TASK-70ee48d645ee477d979dbcf5b7bd8eb6-spec/spec-00019.mzML:scan:7124

Precursor m/z: 313.20 Charge: 0

Bottom: mzspect:GNPS:GNPS-LIBRARY:accession:CCMSLIB00005752037

Precursor m/z: 313.24 Charge: 1

Cosine similarity = 0.7445

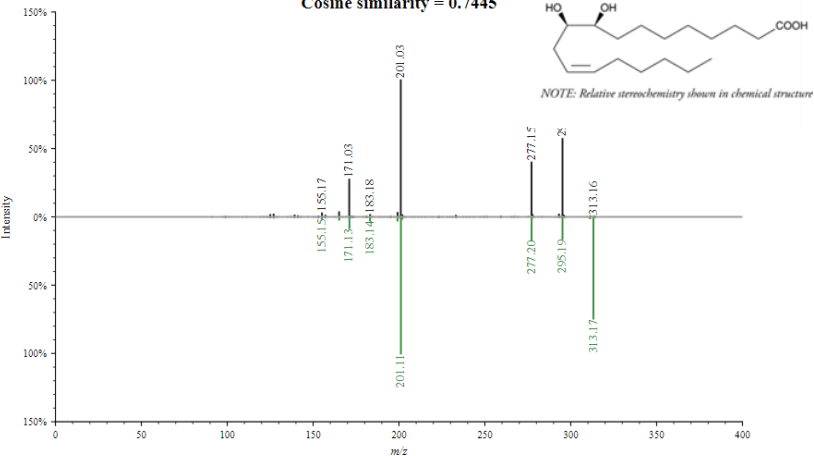

## 12,13-DiHOME in Vasaka

Top: mzspect:GNPS:TASK-70ee48d645ee477d979dbcf5b7bd8eb6-spec/spec-00019.mzML:scan:7062

Precursor m/z: 313.18 Charge: 0

Bottom: mzspect:GNPS:GNPS-LIBRARY:accession:CCMSLIB00003136517

Precursor m/z: 313.25 Charge: 1

Cosine similarity = 0.2640

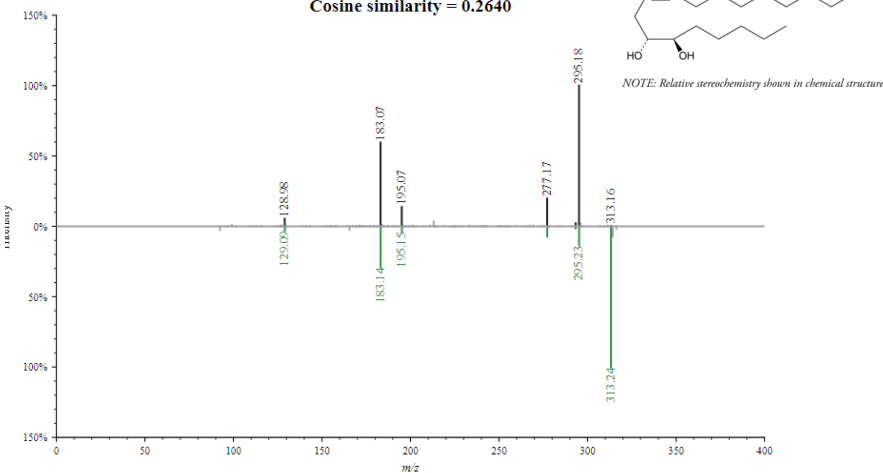

# Supplemental Figure S6C

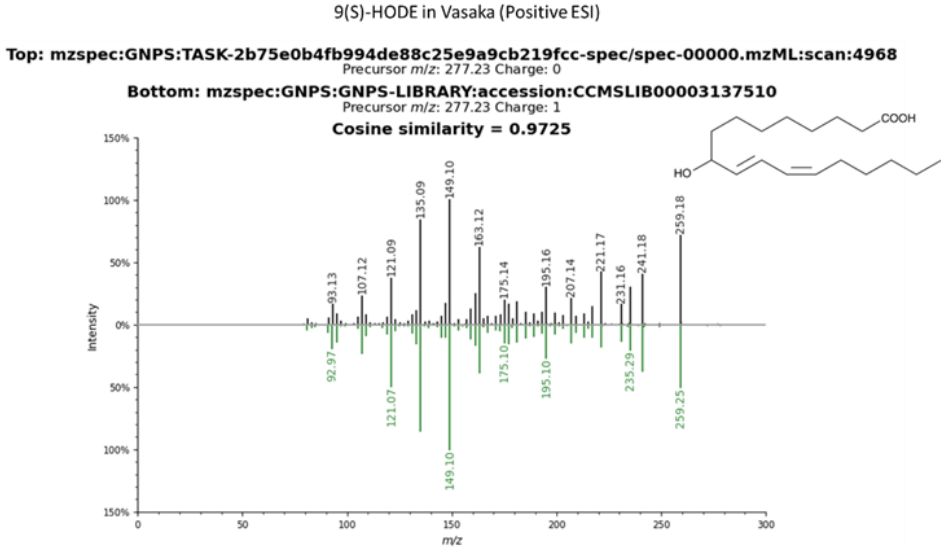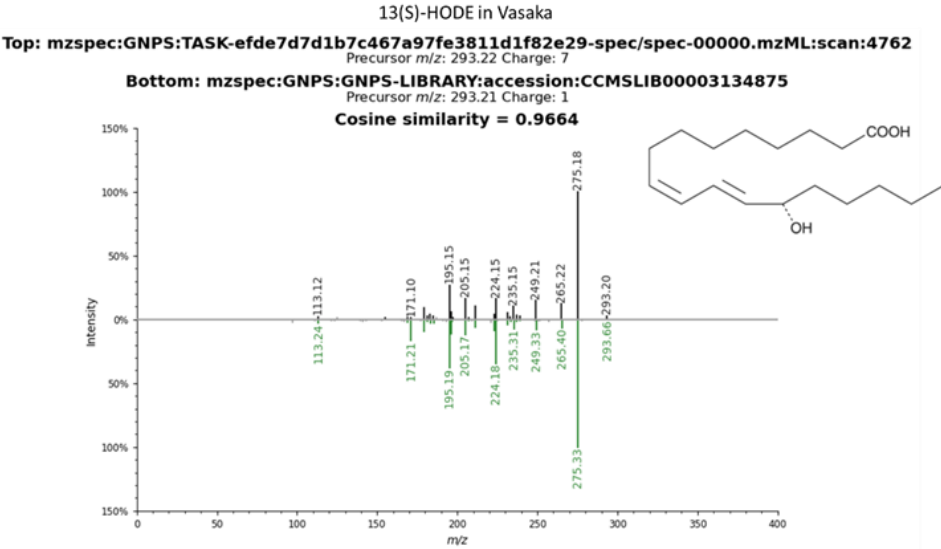

# Supplemental Figure S6D

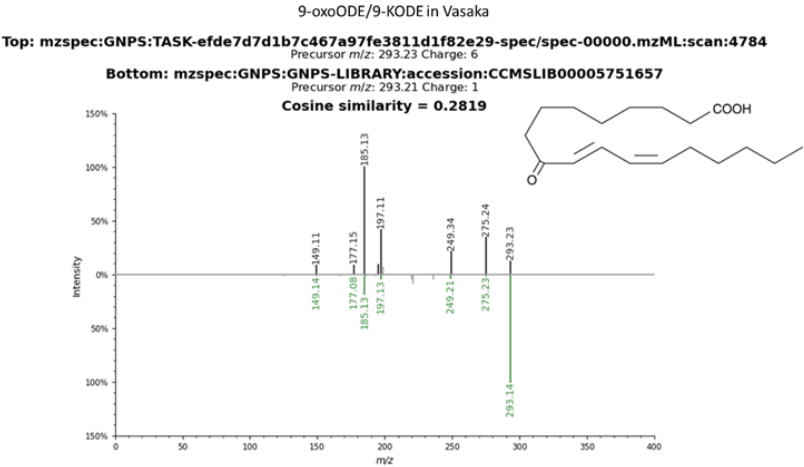

# Supplemental Figure S6E

## 9-HpODE in Vasaka

Top: mzspect:GNPS:TASK-70ee48d645ee477d979dbcf5b7bd8eb6-spec/spec-00019.mzML:scan:6594  
Precursor  $m/z$ : 311.16 Charge: 0  
Bottom: mzspect:GNPS:GNPS-LIBRARY:accession:CCMSLIB00005752901  
Precursor  $m/z$ : 311.22 Charge: 1

Cosine similarity = 0.9226

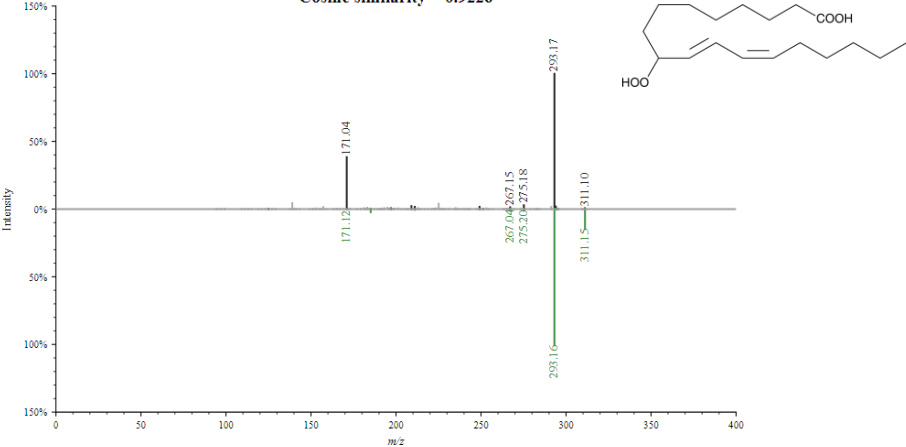

## 13-HpODE in Vasaka

Top: mzspect:GNPS:TASK-70ee48d645ee477d979dbcf5b7bd8eb6-spec/spec-00019.mzML:scan:7150  
Precursor  $m/z$ : 311.15 Charge: 0  
Bottom: mzspect:GNPS:GNPS-LIBRARY:accession:CCMSLIB00005751861  
Precursor  $m/z$ : 311.22 Charge: 1

Cosine similarity = 0.9023

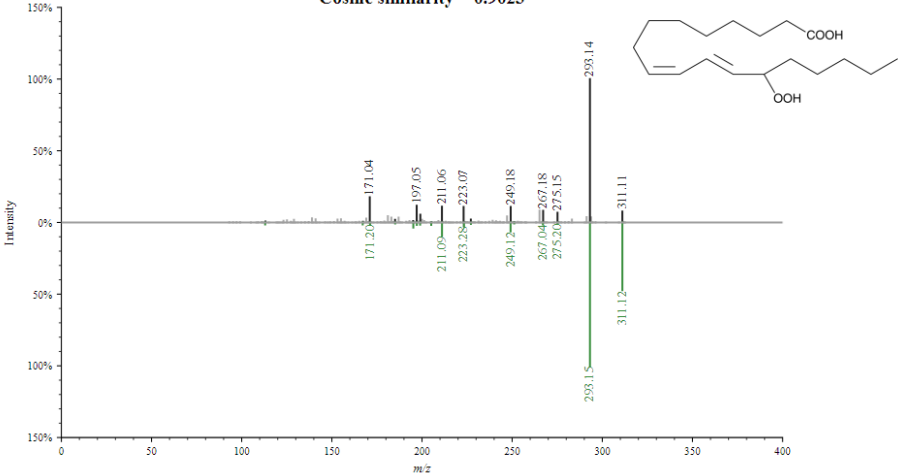

## Supplemental Figure S6F

### Vasaka tea vs. Oxylin standard mix

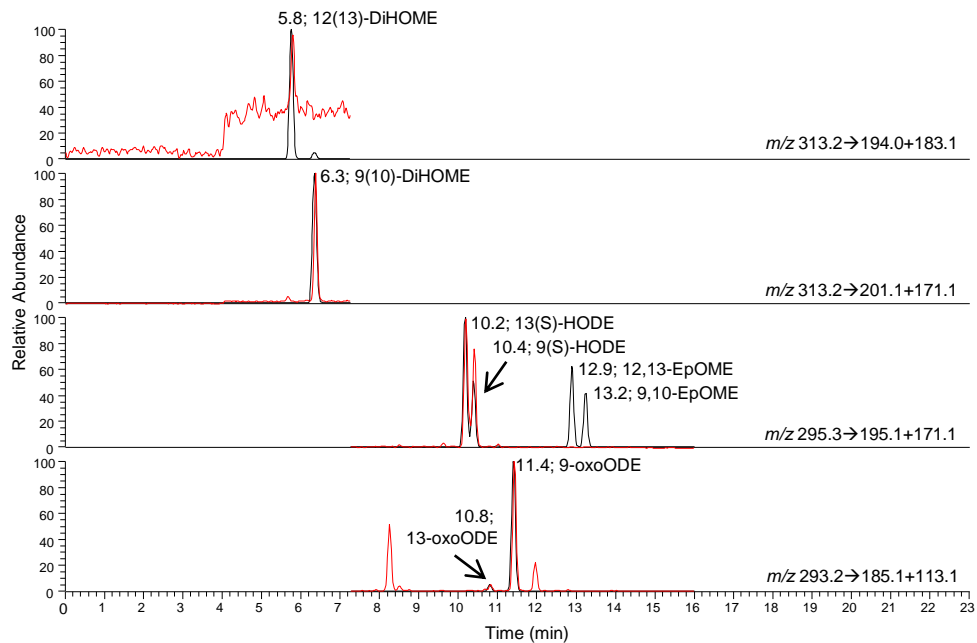

Supplemental Figure S7

TRPA1 Activation

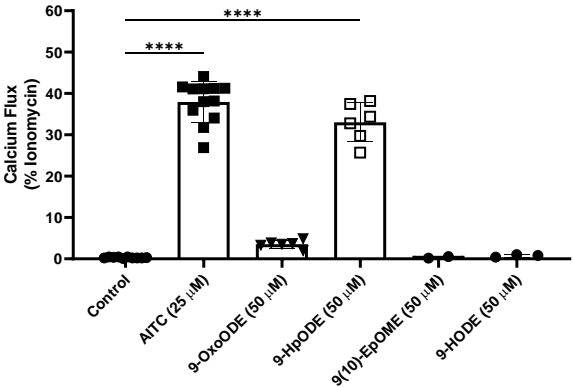

TRPA1 Activation +A967079

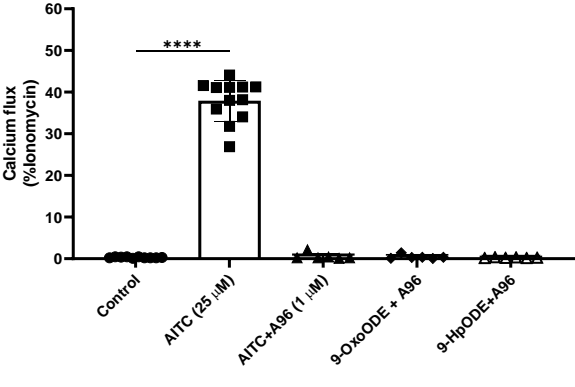

TRPA1 Inhibition

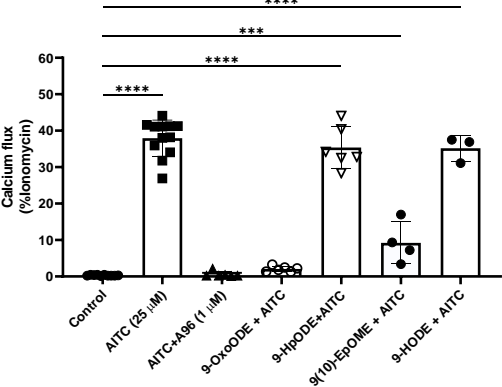

Supplement: s1 [file s1]
